# Supplementary material
Source: MDPI journal article supplement (https://www.mdpi.com/1999-4907/15/4/732)
Supplement: s1 [file s1]

# Drivers of *Hymenoscyphus fraxineus* infections in inner alpine valleys of North Western Italy

Guglielmo Lione <sup>1,2</sup>, Silvia Ongaro <sup>1</sup>, Simona Prencipe <sup>1</sup>, Marianna Giraudo <sup>1</sup> and Paolo Gonthier <sup>1,2\*</sup>

<sup>1</sup> Department of Agricultural, Forest and Food Sciences (DISAFA), University of Torino, Largo P. Braccini 2, I-10095 Grugliasco, Italy

<sup>2</sup> Interdepartmental Centre for Innovation in the Agro-Environmental Sector (AGROINNOVA), University of Torino, Largo P. Braccini 2, I-10095 Grugliasco, Italy

\* Correspondence: paolo.gonthier@unito.it

## Supplementary Table S3

**Citation:** Lione, G.; Ongaro, S.; Prencipe, S.; Giraudo, M.; Gonthier, P. Drivers of *Hymenoscyphus fraxineus* Infections in the Inner-Alpine Valleys of Northwestern Italy. *Forests* 2024, 15, 732. <https://doi.org/10.3390/f15040732>

Academic Editor: Simon Francis Shamoun

Received: 7 March 2024

Revised: 18 April 2024

Accepted: 19 April 2024

Published: 22 April 2024

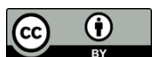

**Copyright:** © 2024 by the authors. Submitted for possible open access publication under the terms and conditions of the Creative Commons Attribution (CC BY) license (<https://creativecommons.org/licenses/by/4.0/>).

Table S3. Raw data and variables used for modelling. For acronyms specification see the main text.

[illegible]
