# Supplementary material
Source: MDPI journal article supplement (https://www.mdpi.com/1999-4907/15/4/732)
Supplement: s1 [file s1]

# Drivers of *Hymenoscyphus fraxineus* infections in inner alpine valleys of North Western Italy

Guglielmo Lione <sup>1,2</sup>, Silvia Ongaro <sup>1</sup>, Simona Prencipe <sup>1</sup>, Marianna Giraudo <sup>1</sup> and Paolo Gonthier <sup>1,2\*</sup>

<sup>1</sup> Department of Agricultural, Forest and Food Sciences (DISAFA), University of Torino, Largo P. Braccini 2, I-10095 Grugliasco, Italy

<sup>2</sup> Interdepartmental Centre for Innovation in the Agro-Environmental Sector (AGROINNOVA), University of Torino, Largo P. Braccini 2, I-10095 Grugliasco, Italy

\* Correspondence: paolo.gonthier@unito.it

## Supplementary Table S2

**Citation:** Lione, G.; Ongaro, S.; Prencipe, S.; Giraudo, M.; Gonthier, P. Drivers of *Hymenoscyphus fraxineus* Infections in the Inner-Alpine Valleys of Northwestern Italy. *Forests* 2024, 15, 732. <https://doi.org/10.3390/f15040732>

Academic Editor: Simon Francis Shamoun

Received: 7 March 2024  
Revised: 18 April 2024  
Accepted: 19 April 2024  
Published: 22 April 2024

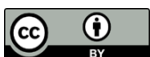

**Copyright:** © 2024 by the authors. Submitted for possible open access publication under the terms and conditions of the Creative Commons Attribution (CC BY) license (<https://creativecommons.org/licenses/by/4.0/>).

Table S2. Results from the fitting of unbiased recursive binary partitioning tree models based on conditional inference. For each input variable (see main text for acronyms definition) the  $c$  and  $P$  values associated with the tree root (is no splits are present) or with the significant splits are reported. When significant  $P$  values are obtained, the corresponding variable is marked with an asterisk (\*) and the critical threshold value for the first and second split (if present) are indicated. The mathematical description of each node is reported in curly brackets with the corresponding input variable interval and associated probability of infection of *Hymenoscyphus fraxineus*, along with the 95% confidence interval bounds.

| Input variable                                                                                                        | Root                                                                                                                                                             | Split 1                                       | Threshold split 1 | Split 2                                         | Threshold split 2 | Nodes                                                                                                                                                   |
|-----------------------------------------------------------------------------------------------------------------------|------------------------------------------------------------------------------------------------------------------------------------------------------------------|-----------------------------------------------|-------------------|-------------------------------------------------|-------------------|---------------------------------------------------------------------------------------------------------------------------------------------------------|
| $x, y, sect$                                                                                                          | -                                                                                                                                                                | $x$<br>$c=3.261$<br>$P=1.98 \cdot 10^{-1}$    | -                 | $x^*$<br>$c=11.197$<br>$P=2.46 \cdot 10^{-3}$   | 358069 m          | $\left\{ \begin{array}{l} y > 5067384 \text{ m} \\ x > 358069 \text{ m} \\ Pr_{(I=1)} = 75.0\% (52.6 - 89.6\% \text{ CI}_{95\%}) \end{array} \right.$   |
|                                                                                                                       | -                                                                                                                                                                | $y^*$<br>$c=5.864$<br>$P=4.56 \cdot 10^{-2}$  | 5067384 m         | $y$<br>$c=0.112$<br>$P=9.82 \cdot 10^{-1}$      | -                 | $\left\{ \begin{array}{l} y \leq 5067384 \text{ m} \\ Pr_{(I=1)} = 17.2\% (9.5 - 28.6\% \text{ CI}_{95\%}) \end{array} \right.$                         |
|                                                                                                                       | -                                                                                                                                                                | $sect$<br>$c=6.568$<br>$P=1.08 \cdot 10^{-1}$ | -                 | $sect^*$<br>$c=9.143$<br>$P=3.07 \cdot 10^{-2}$ | -                 | $\left\{ \begin{array}{l} y > 5067384 \text{ m} \\ x \leq 358069 \text{ m} \\ Pr_{(I=1)} = 10.0\% (1.8 - 31.6\% \text{ CI}_{95\%}) \end{array} \right.$ |
| $dbh, h$                                                                                                              | $dbh$<br>$c=1.832$<br>$P=3.21 \cdot 10^{-1}$                                                                                                                     | -                                             | -                 | -                                               | -                 | -                                                                                                                                                       |
|                                                                                                                       | $h$<br>$c=4.253$<br>$P=7.68 \cdot 10^{-2}$                                                                                                                       |                                               |                   |                                                 |                   |                                                                                                                                                         |
| $el, sl$                                                                                                              | -                                                                                                                                                                | $el^*$<br>$c=5.677$<br>$P=3.41 \cdot 10^{-2}$ | 895 m             | -                                               | -                 | $\left\{ \begin{array}{l} el \leq 895 \text{ m} \\ Pr_{(I=1)} = 46.7\% (29.5 - 65.5\% \text{ CI}_{95\%}) \end{array} \right.$                           |
|                                                                                                                       |                                                                                                                                                                  | $sl$<br>$c=2.510$<br>$P=2.13 \cdot 10^{-1}$   | -                 | -                                               | -                 | $\left\{ \begin{array}{l} el > 895 \text{ m} \\ Pr_{(I=1)} = 18.9\% (11.0 - 29.5\% \text{ CI}_{95\%}) \end{array} \right.$                              |
| $Tmean_1, Tmean_2, Tmean_3, Tmean_4, Tmean_5, Tmean_6, Tmean_7, Tmean_8, Tmean_9, Tmean_{10}, Tmean_{11}, Tmean_{12}$ | $Tmean_1$<br>$c=5.302$<br>$P=2.28 \cdot 10^{-1}$<br><br>$Tmean_2$<br>$c=3.514$<br>$P=5.29 \cdot 10^{-1}$<br><br>$Tmean_3$<br>$c=2.913$<br>$P=6.68 \cdot 10^{-1}$ | -                                             | -                 | -                                               | -                 |                                                                                                                                                         |

|                                                                                                                     |                                                                                                                                                                                                                                                                                                                                                                                                                                                                                                                           |   |   |   |   |  |
|---------------------------------------------------------------------------------------------------------------------|---------------------------------------------------------------------------------------------------------------------------------------------------------------------------------------------------------------------------------------------------------------------------------------------------------------------------------------------------------------------------------------------------------------------------------------------------------------------------------------------------------------------------|---|---|---|---|--|
|                                                                                                                     | $Tmean_4$<br>$c=2.706$<br>$P=7.17 \cdot 10^{-1}$<br><br>$Tmean_5$<br>$c=2.646$<br>$P=7.32 \cdot 10^{-1}$<br><br>$Tmean_6$<br>$c=2.663$<br>$P=7.28 \cdot 10^{-1}$<br><br>$Tmean_7$<br>$c=2.893$<br>$P=6.73 \cdot 10^{-1}$<br><br>$Tmean_8$<br>$c=3.027$<br>$P=6.41 \cdot 10^{-1}$<br><br>$Tmean_9$<br>$c=3.239$<br>$P=5.92 \cdot 10^{-1}$<br><br>$Tmean_{10}$<br>$c=4.000$<br>$P=4.28 \cdot 10^{-1}$<br><br>$Tmean_{11}$<br>$c=4.183$<br>$P=3.94 \cdot 10^{-1}$<br><br>$Tmean_{12}$<br>$c=7.420$<br>$P=7.47 \cdot 10^{-2}$ |   |   |   |   |  |
| $Tmin_1, Tmin_2, Tmin_3, Tmin_4, Tmin_5,$<br>$Tmin_6, Tmin_7, Tmin_8, Tmin_9, Tmin_{10},$<br>$Tmin_{11}, Tmin_{12}$ | $Tmin_1$<br>$c=5.371$<br>$P=2.20 \cdot 10^{-1}$<br><br>$Tmin_2$<br>$c=4.187$<br>$P=3.93 \cdot 10^{-1}$                                                                                                                                                                                                                                                                                                                                                                                                                    | - | - | - | - |  |

|                                                                                                                     |                                                                                                                                                                                                                                                                                                                                                                                                                                                                                                                                                                         |                                                 |   |   |   |                                                                                                        |
|---------------------------------------------------------------------------------------------------------------------|-------------------------------------------------------------------------------------------------------------------------------------------------------------------------------------------------------------------------------------------------------------------------------------------------------------------------------------------------------------------------------------------------------------------------------------------------------------------------------------------------------------------------------------------------------------------------|-------------------------------------------------|---|---|---|--------------------------------------------------------------------------------------------------------|
|                                                                                                                     | $Tmin_3$<br>$c=3.457$<br>$P=5.42 \cdot 10^{-1}$<br><br>$Tmin_4$<br>$c=3.351$<br>$P=5.66 \cdot 10^{-1}$<br><br>$Tmin_5$<br>$c=3.234$<br>$P=5.93 \cdot 10^{-1}$<br><br>$Tmin_6$<br>$c=3.384$<br>$P=5.58 \cdot 10^{-1}$<br><br>$Tmin_7$<br>$c=3.668$<br>$P=4.96 \cdot 10^{-1}$<br><br>$Tmin_8$<br>$c=3.813$<br>$P=4.65 \cdot 10^{-1}$<br><br>$Tmin_9$<br>$c=4.160$<br>$P=3.98 \cdot 10^{-1}$<br><br>$Tmin_{10}$<br>$c=5.126$<br>$P=2.49 \cdot 10^{-1}$<br><br>$Tmin_{11}$<br>$c=4.632$<br>$P=3.18 \cdot 10^{-1}$<br><br>$Tmin_{12}$<br>$c=7.718$<br>$P=6.37 \cdot 10^{-2}$ |                                                 |   |   |   |                                                                                                        |
| $Tmax_1, Tmax_2, Tmax_3, Tmax_4, Tmax_5,$<br>$Tmax_6, Tmax_7, Tmax_8, Tmax_9, Tmax_{10},$<br>$Tmax_{11}, Tmax_{12}$ | -                                                                                                                                                                                                                                                                                                                                                                                                                                                                                                                                                                       | $Tmax_1$<br>$c=6.251$<br>$P=1.39 \cdot 10^{-1}$ | - | - | - | $\{ Tmax_{12} > 4.08501 \text{ } ^\circ\text{C}$<br>$\{ Pr_{(I=1)} = 44.9\% (31.3 - 59.4\% CI_{95\%})$ |

|                                                                                        |                                                                                                    |                                                      |            |   |   |                                                                                                                                |
|----------------------------------------------------------------------------------------|----------------------------------------------------------------------------------------------------|------------------------------------------------------|------------|---|---|--------------------------------------------------------------------------------------------------------------------------------|
|                                                                                        | -                                                                                                  | $Tmax_2$<br>$c=4.606$<br>$P=3.22 \cdot 10^{-1}$      | -          | - | - | $\begin{cases} Tmax_{12} \leq 4.08501 \text{ } ^\circ\text{C} \\ \{Pr_{(I=1)} = 10.9\% (4.9 - 22.2\% CI_{95\%})\} \end{cases}$ |
|                                                                                        | -                                                                                                  | $Tmax_3$<br>$c=4.085$<br>$P=4.12 \cdot 10^{-1}$      | -          | - | - |                                                                                                                                |
|                                                                                        | -                                                                                                  | $Tmax_4$<br>$c=3.986$<br>$P=4.31 \cdot 10^{-1}$      | -          | - | - |                                                                                                                                |
|                                                                                        | -                                                                                                  | $Tmax_5$<br>$c=4.011$<br>$P=4.26 \cdot 10^{-1}$      | -          | - | - |                                                                                                                                |
|                                                                                        | -                                                                                                  | $Tmax_6$<br>$c=4.686$<br>$P=3.10 \cdot 10^{-1}$      | -          | - | - |                                                                                                                                |
|                                                                                        | -                                                                                                  | $Tmax_7$<br>$c=5.051$<br>$P=2.58 \cdot 10^{-1}$      | -          | - | - |                                                                                                                                |
|                                                                                        | -                                                                                                  | $Tmax_8$<br>$c=4.975$<br>$P=2.68 \cdot 10^{-1}$      | -          | - | - |                                                                                                                                |
|                                                                                        | -                                                                                                  | $Tmax_9$<br>$c=4.934$<br>$P=2.74 \cdot 10^{-1}$      | -          | - | - |                                                                                                                                |
|                                                                                        | -                                                                                                  | $Tmax_{10}$<br>$c=5.370$<br>$P=2.20 \cdot 10^{-1}$   | -          | - | - |                                                                                                                                |
|                                                                                        | -                                                                                                  | $Tmax_{11}$<br>$c=4.466$<br>$P=3.44 \cdot 10^{-1}$   | -          | - | - |                                                                                                                                |
|                                                                                        | -                                                                                                  | $Tmax_{12}^*$<br>$c=8.710$<br>$P=3.73 \cdot 10^{-2}$ | 4.08501 °C | - | - |                                                                                                                                |
| $WS_1, WS_2, WS_3, WS_4, WS_5, WS_6, WS_7, WS_8,$<br>$WS_9, WS_{10}, WS_{11}, WS_{12}$ | $WS_1$<br>$c=1.984$<br>$P=8.75 \cdot 10^{-1}$<br><br>$WS_2$<br>$c=2.271$<br>$P=8.17 \cdot 10^{-1}$ | -                                                    | -          | - | - | -                                                                                                                              |

|                                                                       |                                                  |                                              |   |                             |   |                                                                                                                                                                |
|-----------------------------------------------------------------------|--------------------------------------------------|----------------------------------------------|---|-----------------------------|---|----------------------------------------------------------------------------------------------------------------------------------------------------------------|
|                                                                       | $WS_3$<br>$c=1.589$<br>$P=9.39 \cdot 10^{-1}$    |                                              |   |                             |   |                                                                                                                                                                |
|                                                                       | $WS_4$<br>$c=1.477$<br>$P=9.53 \cdot 10^{-1}$    |                                              |   |                             |   |                                                                                                                                                                |
|                                                                       | $WS_5$<br>$c=2.278$<br>$P=8.15 \cdot 10^{-1}$    |                                              |   |                             |   |                                                                                                                                                                |
|                                                                       | $WS_6$<br>$c=2.663$<br>$P=7.28 \cdot 10^{-1}$    |                                              |   |                             |   |                                                                                                                                                                |
|                                                                       | $WS_7$<br>$c=2.423$<br>$P=7.83 \cdot 10^{-1}$    |                                              |   |                             |   |                                                                                                                                                                |
|                                                                       | $WS_8$<br>$c=2.628$<br>$P=7.36 \cdot 10^{-1}$    |                                              |   |                             |   |                                                                                                                                                                |
|                                                                       | $WS_9$<br>$c=2.185$<br>$P=8.35 \cdot 10^{-1}$    |                                              |   |                             |   |                                                                                                                                                                |
|                                                                       | $WS_{10}$<br>$c=1.908$<br>$P=8.89 \cdot 10^{-1}$ |                                              |   |                             |   |                                                                                                                                                                |
|                                                                       | $WS_{11}$<br>$c=1.340$<br>$P=9.67 \cdot 10^{-1}$ |                                              |   |                             |   |                                                                                                                                                                |
|                                                                       | $WS_{12}$<br>$c=1.724$<br>$P=9.19 \cdot 10^{-1}$ |                                              |   |                             |   |                                                                                                                                                                |
| $P_1, P_2, P_3, P_4, P_5, P_6, P_7, P_8, P_9, P_{10}, P_{11}, P_{12}$ | -                                                | $P_1$<br>$c=2.277$<br>$P=8.15 \cdot 10^{-1}$ | - | $P_1$<br>$c=0.062$<br>$P=1$ | - | $\left\{ \begin{array}{l} P_4 > 41.25008 \text{ mm} \\ P_7 > 62.26657 \text{ mm} \\ Pr_{(I=1)} = 80.0\% (53.5 - 94.3\% \text{ CI}_{95\%}) \end{array} \right.$ |

|                                                  |                                                                                                                |                                                 |             |                                                 |             |                                                                                                                                                                                                                                                                |
|--------------------------------------------------|----------------------------------------------------------------------------------------------------------------|-------------------------------------------------|-------------|-------------------------------------------------|-------------|----------------------------------------------------------------------------------------------------------------------------------------------------------------------------------------------------------------------------------------------------------------|
|                                                  | -                                                                                                              | $P_2$<br>$c=1.763$<br>$P=9.13 \cdot 10^{-1}$    | -           | $P_2$<br>$c=0.120$<br>$P=1$                     | -           | $\begin{cases} P_4 > 41.25008 \text{ mm} \\ P_7 \leq 62.26657 \text{ mm} \\ Pr_{(I=1)} = 26.7\% (14.8 - 41.1\% \text{ CI}_{95\%}) \end{cases}$ $\begin{cases} P_4 \leq 41.25008 \text{ mm} \\ Pr_{(I=1)} = 9.1\% (3.2 - 21.0\% \text{ CI}_{95\%}) \end{cases}$ |
|                                                  | -                                                                                                              | $P_3$<br>$c=5.787$<br>$P=1.77 \cdot 10^{-1}$    | -           | $P_3$<br>$c=0.264$<br>$P=1$                     | -           |                                                                                                                                                                                                                                                                |
|                                                  | -                                                                                                              | $P_4^*$<br>$c=8.645$<br>$P=3.87 \cdot 10^{-2}$  | 41.25008 mm | $P_4$<br>$c=0.260$<br>$P=1$                     | -           |                                                                                                                                                                                                                                                                |
|                                                  | -                                                                                                              | $P_5$<br>$c=5.508$<br>$P=2.05 \cdot 10^{-1}$    | -           | $P_5$<br>$c=5.131$<br>$P=2.48 \cdot 10^{-1}$    | -           |                                                                                                                                                                                                                                                                |
|                                                  | -                                                                                                              | $P_6$<br>$c=3.480$<br>$P=5.37 \cdot 10^{-1}$    | -           | $P_6^*$<br>$c=9.648$<br>$P=2.25 \cdot 10^{-2}$  | -           |                                                                                                                                                                                                                                                                |
|                                                  | -                                                                                                              | $P_7$<br>$c=0.925$<br>$P=9.93 \cdot 10^{-1}$    | -           | $P_7^*$<br>$c=11.271$<br>$P=9.41 \cdot 10^{-3}$ | 62.26657 mm |                                                                                                                                                                                                                                                                |
|                                                  | -                                                                                                              | $P_8$<br>$c=1.459$<br>$P=9.55 \cdot 10^{-1}$    | -           | $P_8^*$<br>$c=8.685$<br>$P=3.78 \cdot 10^{-2}$  | -           |                                                                                                                                                                                                                                                                |
|                                                  | -                                                                                                              | $P_9$<br>$c=0.432$<br>$P=1$                     | -           | $P_9$<br>$c=2.113$<br>$P=8.50 \cdot 10^{-1}$    | -           |                                                                                                                                                                                                                                                                |
|                                                  | -                                                                                                              | $P_{10}$<br>$c=0.897$<br>$P=9.94 \cdot 10^{-1}$ | -           | $P_{10}$<br>$c=0.257$<br>$P=1$                  | -           |                                                                                                                                                                                                                                                                |
|                                                  | -                                                                                                              | $P_{11}$<br>$c=5.855$<br>$P=1.71 \cdot 10^{-1}$ | -           | $P_{11}$<br>$c=0.012$<br>$P=1$                  | -           |                                                                                                                                                                                                                                                                |
|                                                  | -                                                                                                              | $P_{12}$<br>$c=2.800$<br>$P=6.95 \cdot 10^{-1}$ | -           | $P_{11}$<br>$c=0.122$<br>$P=1$                  | -           |                                                                                                                                                                                                                                                                |
|                                                  | -                                                                                                              | $P_{12}$<br>$c=2.800$<br>$P=6.95 \cdot 10^{-1}$ | -           | $P_{11}$<br>$c=0.122$<br>$P=1$                  | -           |                                                                                                                                                                                                                                                                |
| $Tmean_{fa}, Tmean_{wi}, Tmean_{sp}, Tmean_{su}$ | $Tmean_{fa}$<br>$c=3.839$<br>$P=1.86 \cdot 10^{-1}$<br><br>$Tmean_{wi}$<br>$c=5.139$<br>$P=9.04 \cdot 10^{-2}$ | -                                               | -           | -                                               | -           | -                                                                                                                                                                                                                                                              |

|                                              |                                                                                                                                                                                                                                  |   |   |   |   |   |
|----------------------------------------------|----------------------------------------------------------------------------------------------------------------------------------------------------------------------------------------------------------------------------------|---|---|---|---|---|
|                                              | $Tmean_{sp}$<br>$c=2.756$<br>$P=3.35 \cdot 10^{-1}$<br><br>$Tmean_{su}$<br>$c=2.884$<br>$P=3.13 \cdot 10^{-1}$                                                                                                                   |   |   |   |   |   |
| $Tmin_{fa}, Tmin_{wi}, Tmin_{sp}, Tmin_{su}$ | $Tmin_{fa}$<br>$c=4.522$<br>$P=1.27 \cdot 10^{-1}$<br><br>$Tmin_{wi}$<br>$c=5.620$<br>$P=6.91 \cdot 10^{-2}$<br><br>$Tmin_{sp}$<br>$c=3.346$<br>$P=2.43 \cdot 10^{-1}$<br><br>$Tmin_{su}$<br>$c=3.659$<br>$P=2.05 \cdot 10^{-1}$ | - | - | - | - | - |
| $Tmax_{fa}, Tmax_{wi}, Tmax_{sp}, Tmax_{su}$ | $Tmax_{fa}$<br>$c=4.697$<br>$P=1.15 \cdot 10^{-1}$<br><br>$Tmax_{wi}$<br>$c=6.136$<br>$P=5.20 \cdot 10^{-2}$<br><br>$Tmax_{sp}$<br>$c=3.867$<br>$P=1.83 \cdot 10^{-1}$<br><br>$Tmax_{su}$<br>$c=4.789$<br>$P=1.10 \cdot 10^{-1}$ | - | - | - | - | - |
| $WS_{fa}, WS_{wi}, WS_{sp}, WS_{su}$         | $WS_{fa}$<br>$c=1.924$<br>$P=5.15 \cdot 10^{-1}$                                                                                                                                                                                 | - | - | - | - | - |



|                                  |                                                     |                                                   |              |   |   |                                                                                                                                                                                                              |
|----------------------------------|-----------------------------------------------------|---------------------------------------------------|--------------|---|---|--------------------------------------------------------------------------------------------------------------------------------------------------------------------------------------------------------------|
|                                  | $W_{S_{wi}}$<br>$c=2.026$<br>$P=4.89 \cdot 10^{-1}$ |                                                   |              |   |   |                                                                                                                                                                                                              |
|                                  | $W_{S_{sp}}$<br>$c=1.796$<br>$P=5.48 \cdot 10^{-1}$ |                                                   |              |   |   |                                                                                                                                                                                                              |
|                                  | $W_{S_{su}}$<br>$c=2.574$<br>$P=3.69 \cdot 10^{-1}$ |                                                   |              |   |   |                                                                                                                                                                                                              |
| $P_{fa}, P_{wi}, P_{sp}, P_{su}$ | -                                                   | $P_{fa}$<br>$c=4.657$<br>$P=1.18 \cdot 10^{-1}$   | -            | - | - | $\begin{cases} P_{sp} > 161.00604 \text{ mm} \\ Pr_{(I=1)} = 51.4\% (34.9 - 67.5\% \text{ CI}_{95\%}) \\ P_{sp} \leq 161.00604 \text{ mm} \\ Pr_{(I=1)} = 14.5\% (7.4 - 25\% \text{ CI}_{95\%}) \end{cases}$ |
|                                  | -                                                   | $P_{wi}$<br>$c=2.356$<br>$P=4.13 \cdot 10^{-1}$   | -            | - | - |                                                                                                                                                                                                              |
|                                  | -                                                   | $P_{sp}^*$<br>$c=9.408$<br>$P=8.61 \cdot 10^{-3}$ | 161.00604 mm | - | - |                                                                                                                                                                                                              |
|                                  | -                                                   | $P_{su}$<br>$c=1.919$<br>$P=5.16 \cdot 10^{-1}$   | -            | - | - |                                                                                                                                                                                                              |
