# Supplementary material
Source: MDPI journal article supplement (https://www.mdpi.com/1999-4907/15/4/732)
Supplement: s1 [file s1]

# Drivers of *Hymenoscyphus fraxineus* infections in inner alpine valleys of North Western Italy

Guglielmo Lione <sup>1,2</sup>, Silvia Ongaro <sup>1</sup>, Simona Prencipe <sup>1</sup>, Marianna Giraudo <sup>1</sup> and Paolo Gonthier <sup>1,2\*</sup>

<sup>1</sup> Department of Agricultural, Forest and Food Sciences (DISAFA), University of Torino, Largo P. Braccini 2, I-10095 Grugliasco, Italy

<sup>2</sup> Interdepartmental Centre for Innovation in the Agro-Environmental Sector (AGROINNOVA), University of Torino, Largo P. Braccini 2, I-10095 Grugliasco, Italy

\* Correspondence: paolo.gonthier@unito.it

## Supplementary Table S4

**Citation:** Lione, G.; Ongaro, S.; Prencipe, S.; Giraudo, M.; Gonthier, P. Drivers of *Hymenoscyphus fraxineus* Infections in the Inner-Alpine Valleys of Northwestern Italy. *Forests* 2024, 15, 732. <https://doi.org/10.3390/f15040732>

Academic Editor: Simon Francis Shamoun

Received: 7 March 2024

Revised: 18 April 2024

Accepted: 19 April 2024

Published: 22 April 2024

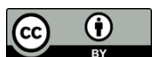

**Copyright:** © 2024 by the authors. Submitted for possible open access publication under the terms and conditions of the Creative Commons Attribution (CC BY) license (<https://creativecommons.org/licenses/by/4.0/>).

Table S4. Decreasing spatial gradients of the incidence and impact of *Hymenoscyphus fraxineus* and of the monthly precipitations of April ( $P_4$ ) and July ( $P_7$ ). For each variable the direction from an octant O1 ( $R < 0$ ) to the opposite O2 ( $R > 0$ ) is expressed as O1  $\rightarrow$  O2 ( $\mp R$ ) and the corresponding R values are indicated. Impact variables acronyms are defined as follows: incidence of *H. fraxineus* (*inc*), ash crown transparency (*ctr*), number of lesions observed at the stem base (*nl*), and percentage of leaves displaying necrotic stains on the lamina (*pnl*). Directions acronyms used are derived from the standard windrose directions.

| Variable   | N $\rightarrow$ S | NE $\rightarrow$ SW | E $\rightarrow$ W | SE $\rightarrow$ NW |
|------------|-------------------|---------------------|-------------------|---------------------|
| <i>inc</i> | $\mp 0.34$        | $\mp 0.43$          | $\mp 0.38$        | $\mp 0.24$          |
| <i>ctr</i> | $\mp 0.33$        | $\mp 0.19$          | $\mp 0.29$        | $\mp 0.32$          |
| <i>nl</i>  | $\mp 0.16$        | $\mp 0.39$          | $\mp 0.30$        | $\mp 0.29$          |
| <i>pnl</i> | $\mp 0.44$        | $\mp 0.22$          | $\mp 0.09$        | $\mp 0.05$          |
| $P_7$      | $\mp 0.62$        | $\mp 0.37$          | $\mp 0.47$        | $\mp 0.57$          |
| $P_4$      | $\mp 0.25$        | $\mp 0.43$          | $\mp 0.51$        | $\mp 0.53$          |
