# Supplementary material
Source: MDPI journal article supplement (https://www.mdpi.com/1999-4907/15/4/732)
Supplement: s1 [file s1]

# Drivers of *Hymenoscyphus fraxineus* infections in inner alpine valleys of North Western Italy

Guglielmo Lione <sup>1,2</sup>, Silvia Ongaro <sup>1</sup>, Simona Prencipe <sup>1</sup>, Marianna Giraudo <sup>1</sup> and Paolo Gonthier <sup>1,2\*</sup>

<sup>1</sup> Department of Agricultural, Forest and Food Sciences (DISAFA), University of Torino, Largo P. Braccini 2, I-10095 Grugliasco, Italy

<sup>2</sup> Interdepartmental Centre for Innovation in the Agro-Environmental Sector (AGROINNOVA), University of Torino, Largo P. Braccini 2, I-10095 Grugliasco, Italy

\* Correspondence: paolo.gonthier@unito.it

## Supplementary Table S1

**Citation:** Lione, G.; Ongaro, S.; Prencipe, S.; Giraudo, M.; Gonthier, P. Drivers of *Hymenoscyphus fraxineus* Infections in the Inner-Alpine Valleys of Northwestern Italy. *Forests* 2024, 15, 732. <https://doi.org/10.3390/f15040732>

Academic Editor: Simon Francis Shamoun

Received: 7 March 2024

Revised: 18 April 2024

Accepted: 19 April 2024

Published: 22 April 2024

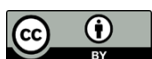

**Copyright:** © 2024 by the authors. Submitted for possible open access publication under the terms and conditions of the Creative Commons Attribution (CC BY) license (<https://creativecommons.org/licenses/by/4.0/>).

Table S1. Weather stations used for the climatic characterization of the study sites. For each station its id, name, longitude ( $x$  in m, UTM WGS84 zone 32 N), latitude ( $y$  in m, UTM WGS84 zone 32 N), elevation ( $el$ , in m a.s.l.), reference sampling site (site) and weight used for modelling ( $w$ ) are reported.

| ID | Weather station name            | $x$    | $y$     | $el$ | site | $w$      |
|----|---------------------------------|--------|---------|------|------|----------|
| 1  | Arvier - Chamençon              | 352607 | 5060043 | 1238 | B    | 1.38E-04 |
|    |                                 |        |         |      | C    | 1.58E-04 |
|    |                                 |        |         |      | I    | 1.42E-04 |
|    |                                 |        |         |      | L    | 1.94E-04 |
| 2  | Arvier - Cooperativa Enfer      | 357236 | 5062907 | 738  | C    | 1.34E-04 |
|    |                                 |        |         |      | E    | 3.65E-04 |
|    |                                 |        |         |      | I    | 1.39E-04 |
|    |                                 |        |         |      | L    | 1.59E-04 |
|    |                                 |        |         |      | M    | 3.34E-04 |
| 3  | Aymavilles - Vieyes             | 363704 | 5056617 | 1139 | D    | 2.49E-04 |
| 4  | Brusson - Tchampats             | 400310 | 5068423 | 1288 | O    | 2.15E-04 |
|    |                                 |        |         |      | P    | 1.41E-04 |
| 5  | Chamois - Lac de Lou            | 393059 | 5077703 | 2020 | N    | 1.28E-04 |
| 6  | Champdepraz - Ponte Dora Baltea | 396716 | 5059550 | 370  | O    | 1.61E-04 |
|    |                                 |        |         |      | P    | 1.75E-04 |
| 7  | Courmayeur - Dolonne            | 341954 | 5073223 | 1200 | A    | 4.00E-04 |
|    |                                 |        |         |      | F    | 8.30E-04 |
|    |                                 |        |         |      | G    | 6.12E-04 |
| 8  | Courmayeur - Mont de la Saxe    | 343231 | 5075695 | 2110 | A    | 4.81E-04 |
|    |                                 |        |         |      | F    | 4.73E-04 |
| 9  | Etroubles - Chevière            | 362708 | 5075203 | 1339 | S    | 3.54E-03 |
|    |                                 |        |         |      | U    | 1.47E-04 |
|    |                                 |        |         |      | V    | 2.15E-04 |
| 10 | Fénis - Clavalité               | 383242 | 5060256 | 1531 | T    | 1.82E-04 |
| 11 | La Thuile - Les Granges         | 341802 | 5066023 | 1637 | B    | 1.39E-04 |
|    |                                 |        |         |      | C    | 1.15E-04 |

|    |                                       |        |         |      |   |          |
|----|---------------------------------------|--------|---------|------|---|----------|
|    |                                       |        |         |      | H | 7.07E-04 |
| 12 | La Thuile - Villaret                  | 340910 | 5063804 | 1488 | B | 1.18E-04 |
|    |                                       |        |         |      | H | 2.73E-04 |
| 13 | Morgex - Capoluogo                    | 347456 | 5069076 | 938  | B | 3.15E-04 |
|    |                                       |        |         |      | C | 2.32E-04 |
|    |                                       |        |         |      | I | 2.28E-04 |
|    |                                       |        |         |      | L | 1.78E-04 |
| 14 | Morgex - Lavancher                    | 346131 | 5073201 | 2842 | A | 1.78E-04 |
|    |                                       |        |         |      | F | 2.09E-04 |
|    |                                       |        |         |      | G | 2.31E-04 |
| 15 | Nus - Saint-Barthélemy - Osservatorio | 381708 | 5071839 | 1675 | R | 9.88E-05 |
|    |                                       |        |         |      | T | 1.55E-04 |
| 16 | Ollomont - By                         | 368136 | 5082279 | 2017 | R | 1.38E-04 |
|    |                                       |        |         |      | U | 1.35E-04 |
| 17 | Pré-Saint-Didier - Plan Praz          | 340756 | 5068855 | 2144 | A | 1.46E-04 |
|    |                                       |        |         |      | G | 2.94E-04 |
|    |                                       |        |         |      | H | 5.15E-04 |
| 18 | Rhêmes-Saint-Georges - Capoluogo      | 356051 | 5056785 | 1179 | D | 2.61E-04 |
|    |                                       |        |         |      | E | 2.23E-04 |
| 19 | Roisan - Preyl                        | 369145 | 5071191 | 935  | R | 1.43E-04 |
|    |                                       |        |         |      | S | 1.32E-04 |
|    |                                       |        |         |      | U | 2.55E-04 |
| 20 | Saint-Christophe - Aeroporto          | 372684 | 5066382 | 545  | Q | 2.48E-04 |
| 21 | Saint-Denis - Raffort                 | 389273 | 5067242 | 840  | N | 2.95E-04 |
| 22 | Saint-Marcel - Surpian                | 378991 | 5065964 | 540  | Q | 2.56E-04 |
|    |                                       |        |         |      | T | 4.99E-04 |
| 23 | Saint-Pierre - Lago delle Rane        | 358609 | 5069393 | 2370 | I | 1.28E-04 |
|    |                                       |        |         |      | L | 1.16E-04 |
| 24 | Saint-Rhémy-en-Bosses - Crévacol      | 356768 | 5076709 | 2018 | S | 1.60E-04 |
|    |                                       |        |         |      | V | 5.02E-04 |

|    |                                           |        |         |      |   |          |
|----|-------------------------------------------|--------|---------|------|---|----------|
| 25 | Saint-Rhémy-en-Bosses - Gran San Bernardo | 356697 | 5081207 | 2360 | V | 1.63E-04 |
| 26 | Saint-Vincent - Terme                     | 395199 | 5067101 | 626  | N | 1.72E-04 |
|    |                                           |        |         |      | O | 1.47E-04 |
| 27 | Valpelline - Chosoz                       | 371034 | 5076159 | 1029 | R | 4.63E-04 |
|    |                                           |        |         |      | U | 5.32E-04 |
| 28 | Valsavarenche - Orvieille                 | 358944 | 5048962 | 2170 | D | 1.43E-04 |
| 29 | Verrès - Capoluogo                        | 397650 | 5057683 | 375  | O | 1.40E-04 |
|    |                                           |        |         |      | P | 1.70E-04 |
| 30 | Villeneuve - S.R. Saint-Nicolas           | 360465 | 5063101 | 839  | E | 3.10E-04 |
|    |                                           |        |         |      | M | 5.34E-04 |
