# Supplementary material
Source: MDPI journal article supplement (https://www.mdpi.com/1999-4907/15/4/732)
Supplement: s1 [file s1]

Archive with 4 entries (4 files):
- Table S1.pdf
- Table S2.pdf
- Table S3.pdf
- Table S4.pdf
